# Supplementary material for: Apocynin prevents mitochondrial burdens, microglial activation, and pro-apoptosis induced by a toxic dose of methamphetamine in the striatum of mice via inhibition of p47phox activation by ERK
Source: PubMed Central journal article supplement (PMC4717833; doi:10.1186/s12974-016-0478-x), 2016-01-18
Supplement: 12974_2016_478_MOESM2_ESM.pdf [file 12974_2016_478_MOESM2_ESM.pdf]

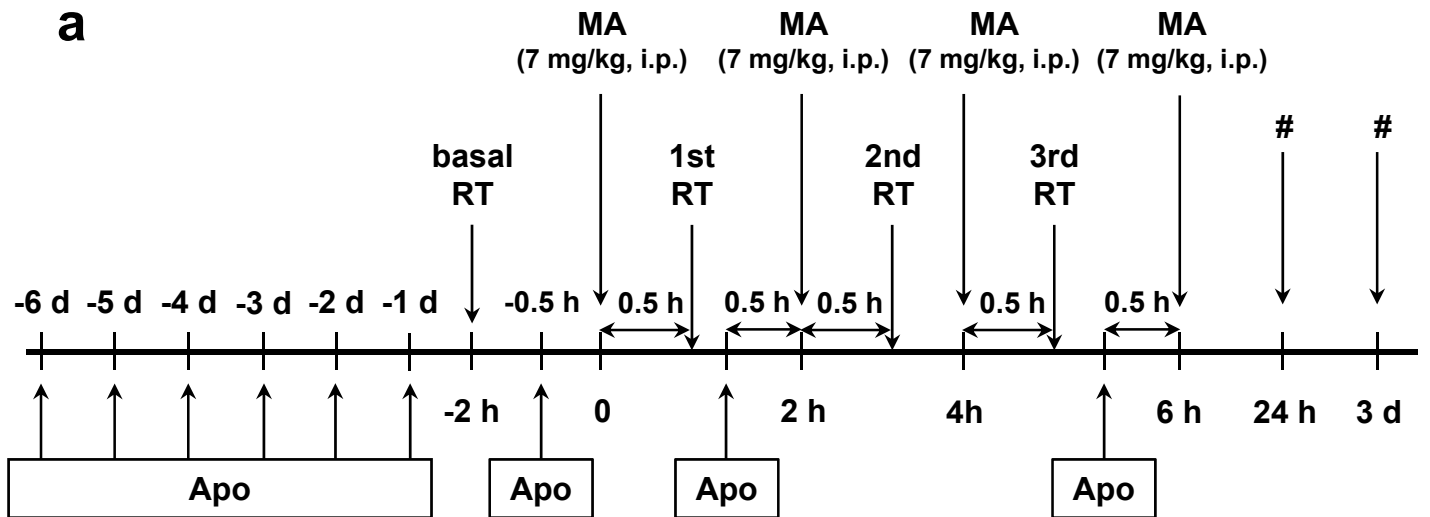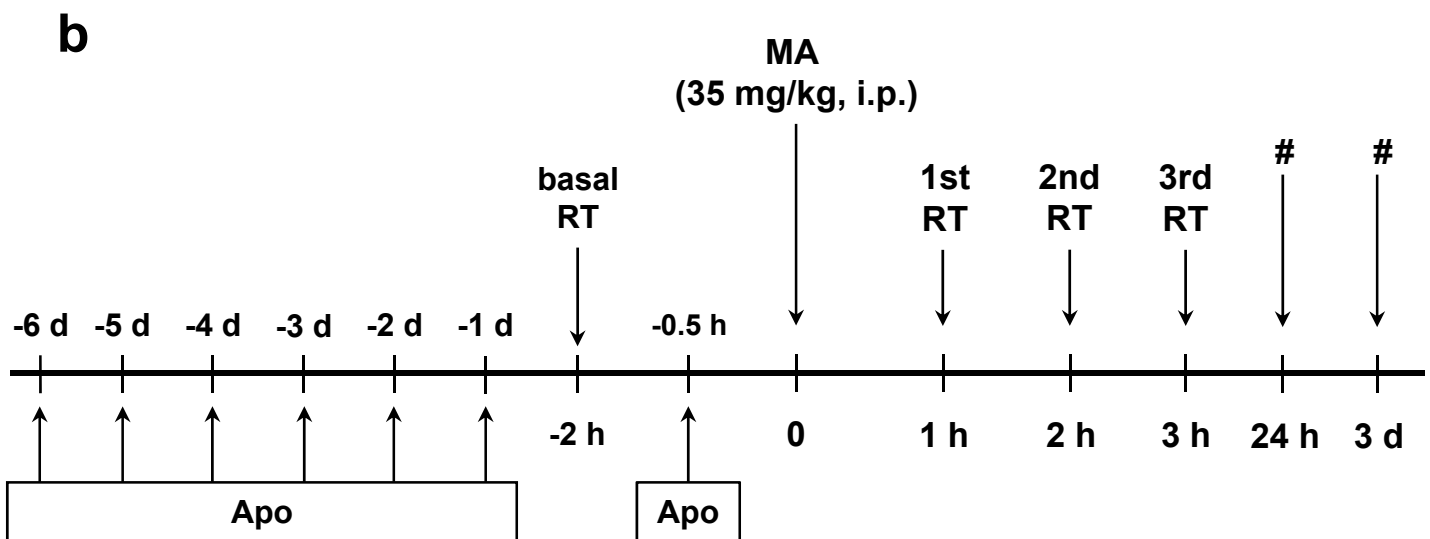

RT: Rectal temperature

#: Sacrifice

Fig. S1

**a**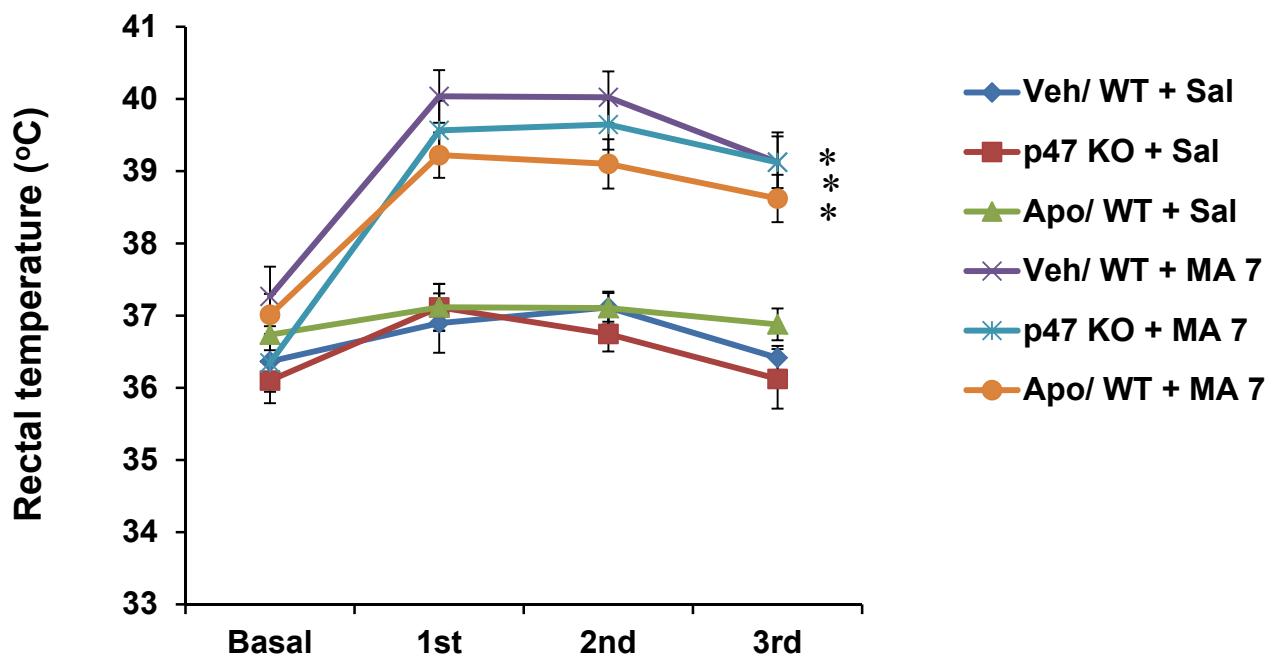**b**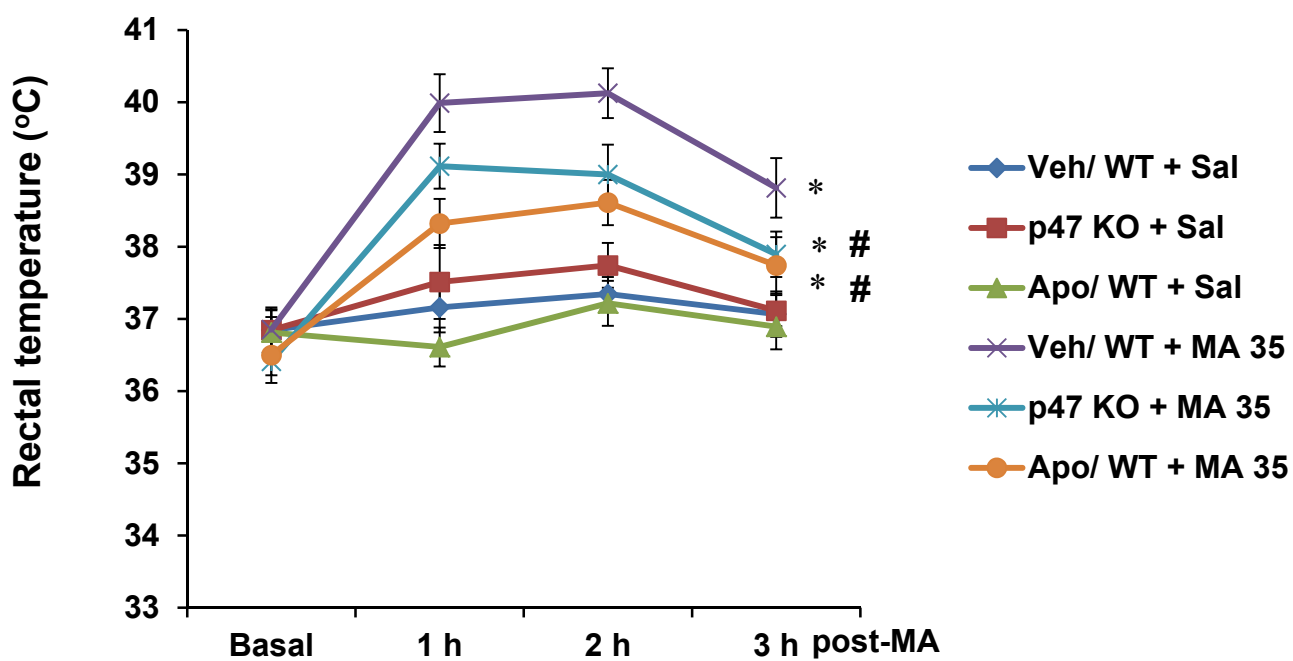

Fig. S2

# TH-immunoreactivity (TH-IR)

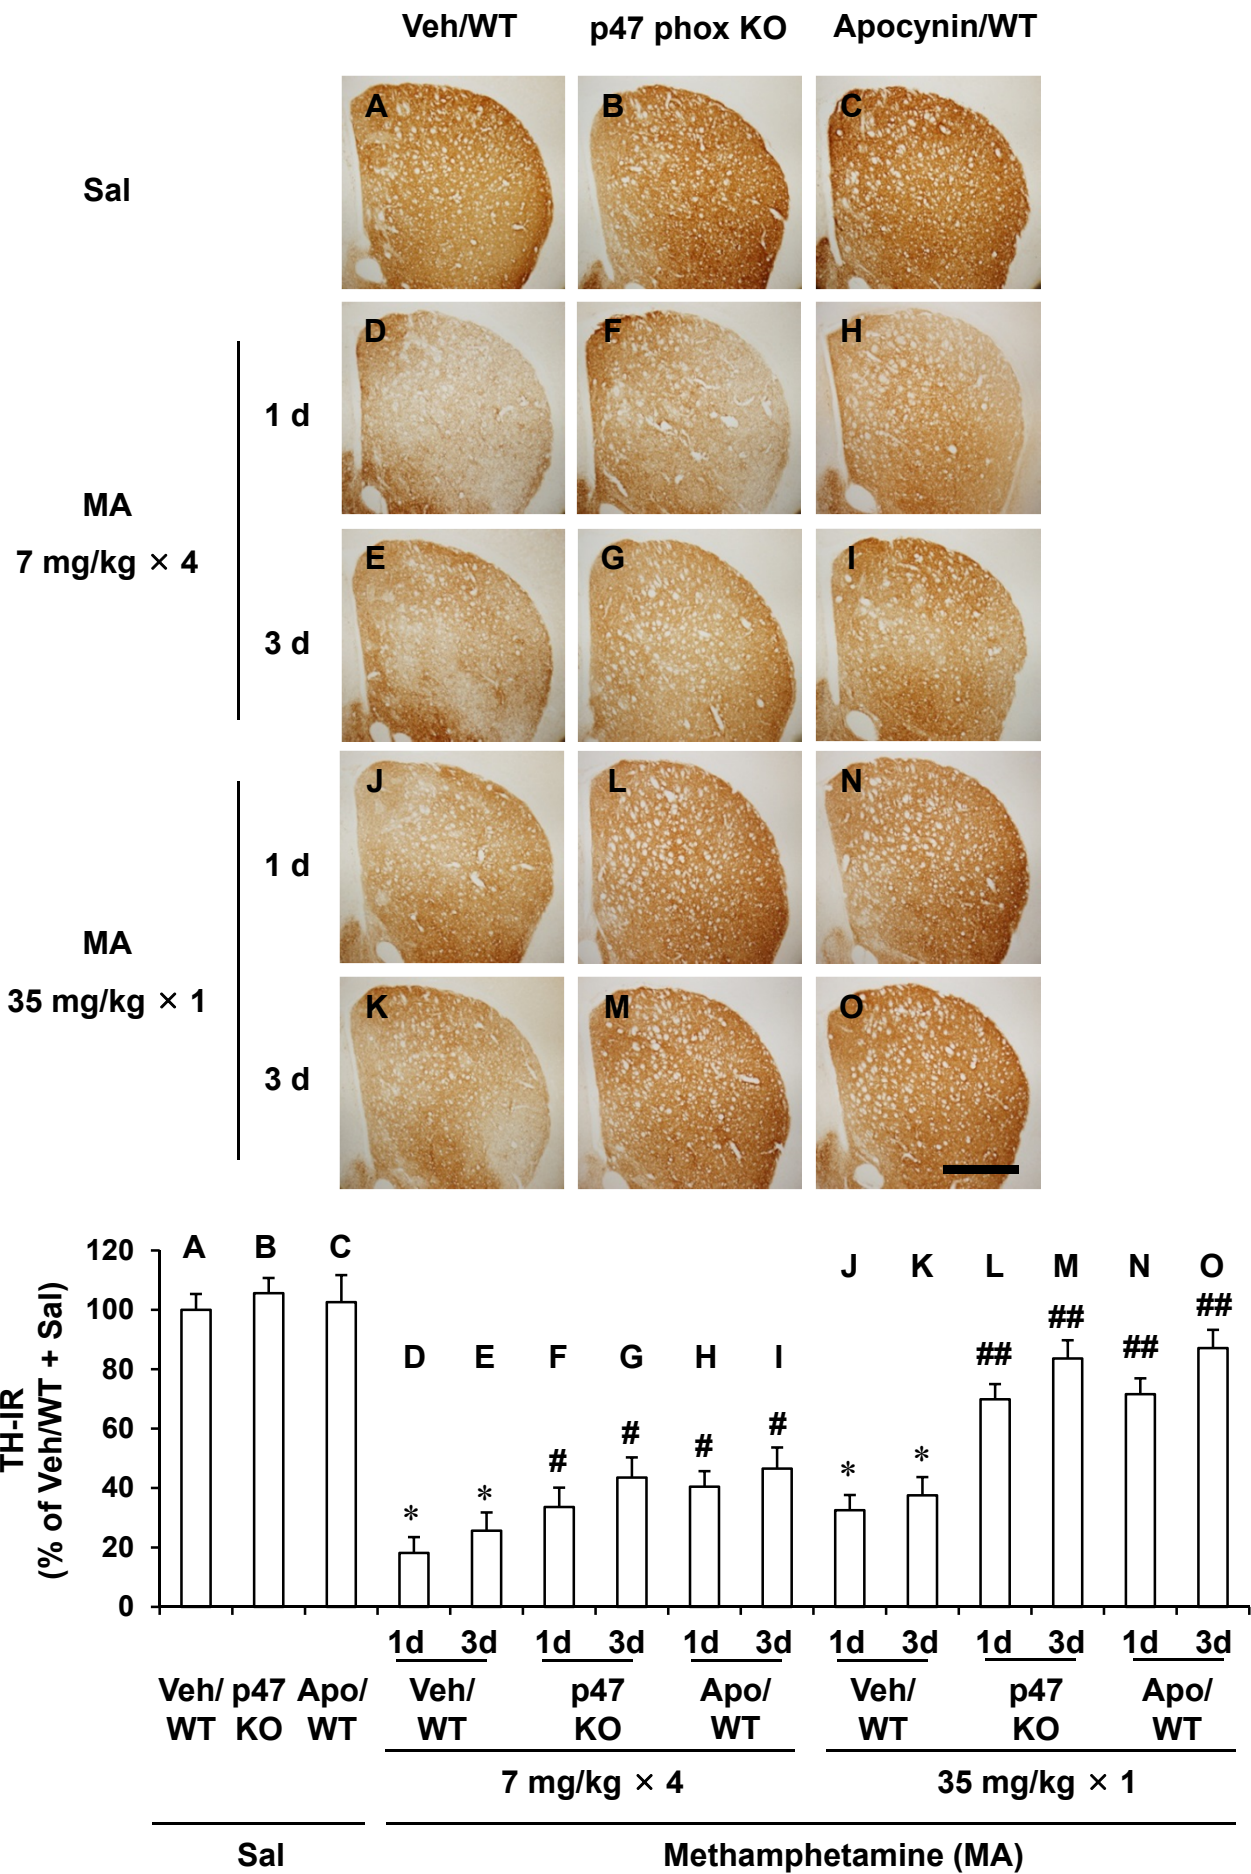

Fig. S3

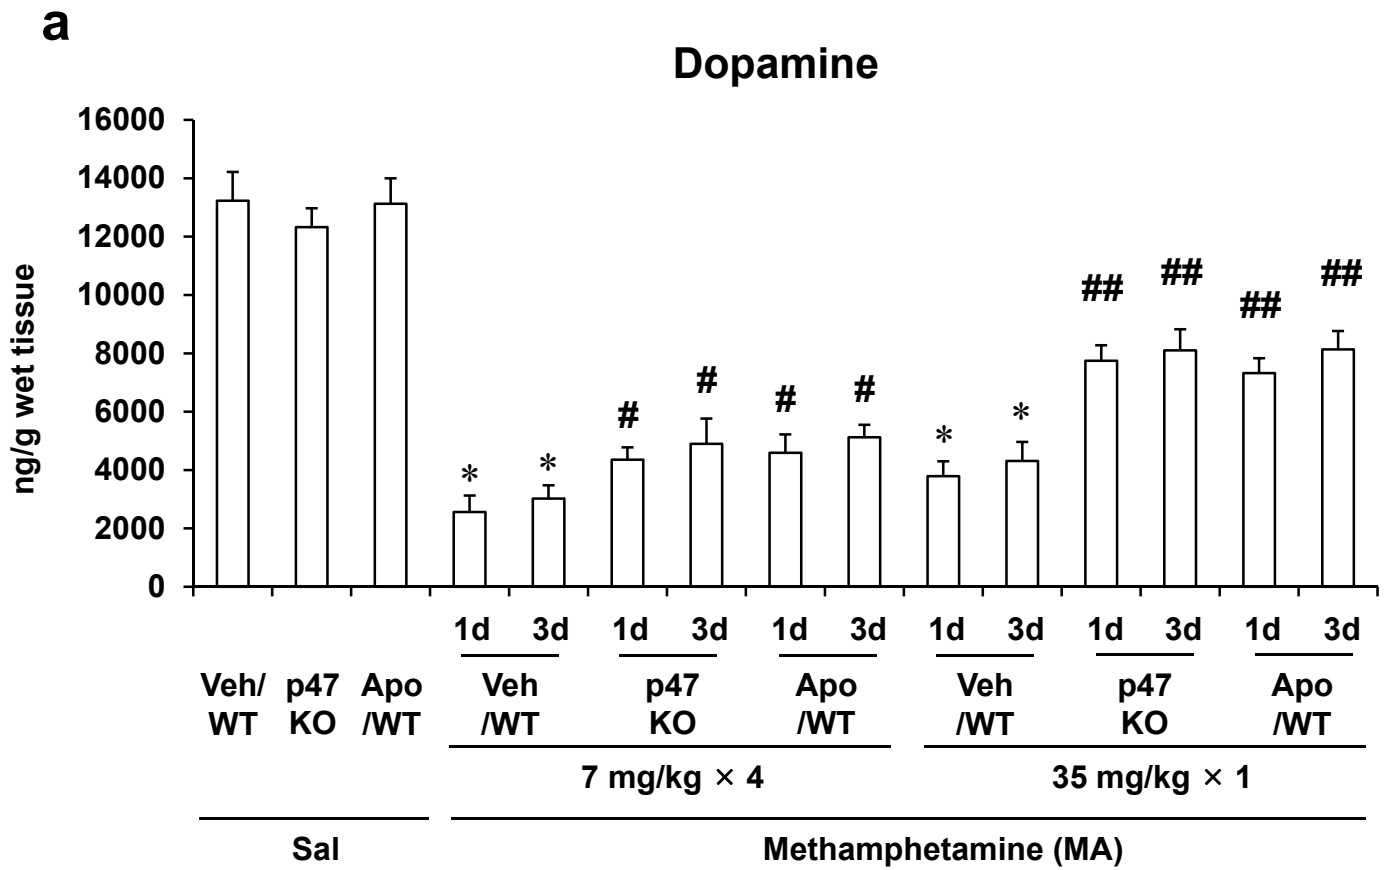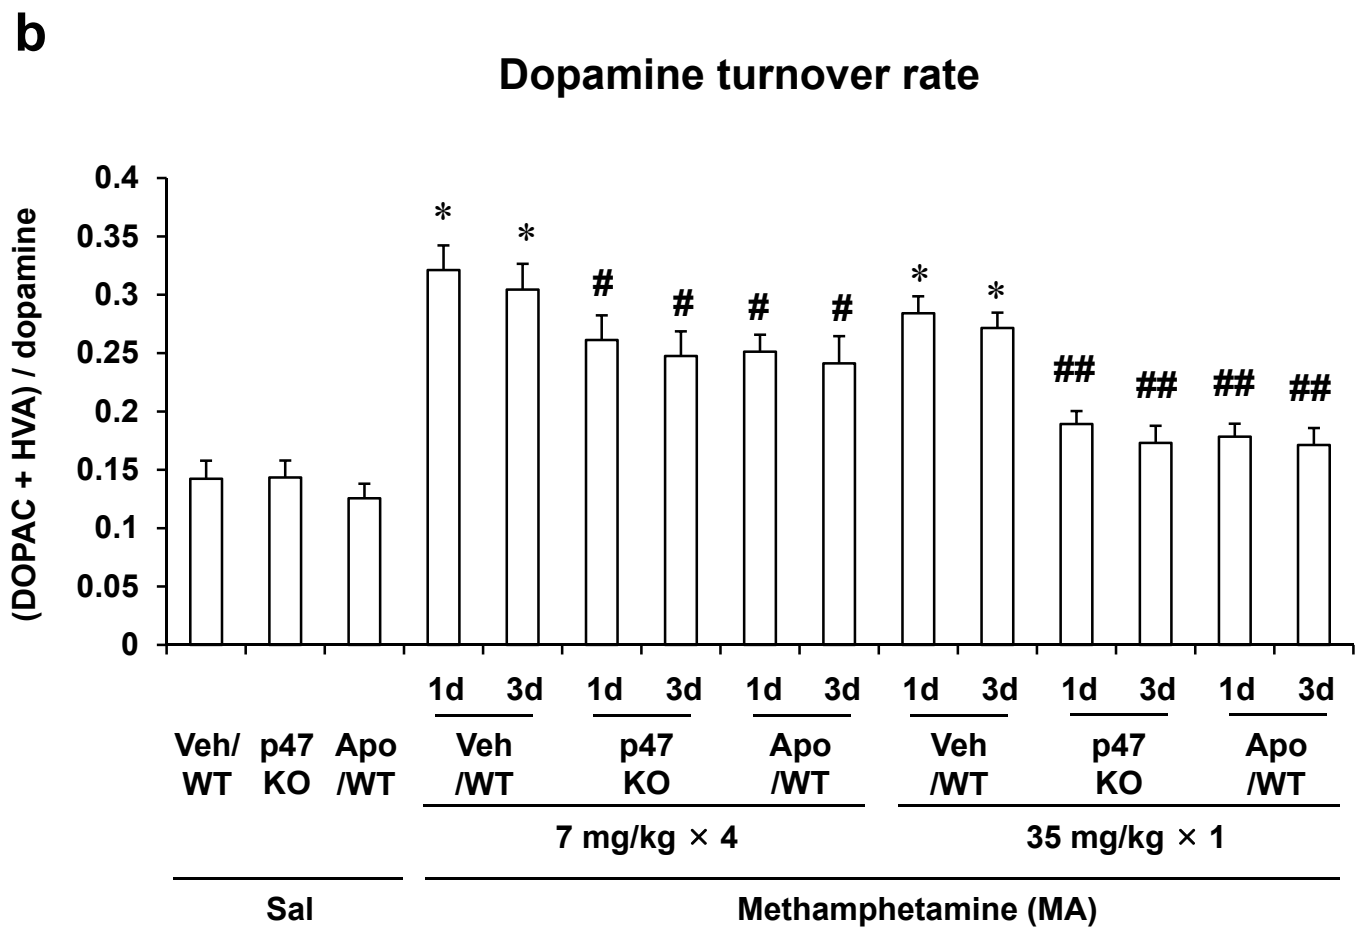

Fig. S4

**a**

**MA**  
(35 mg/kg, i.p.)

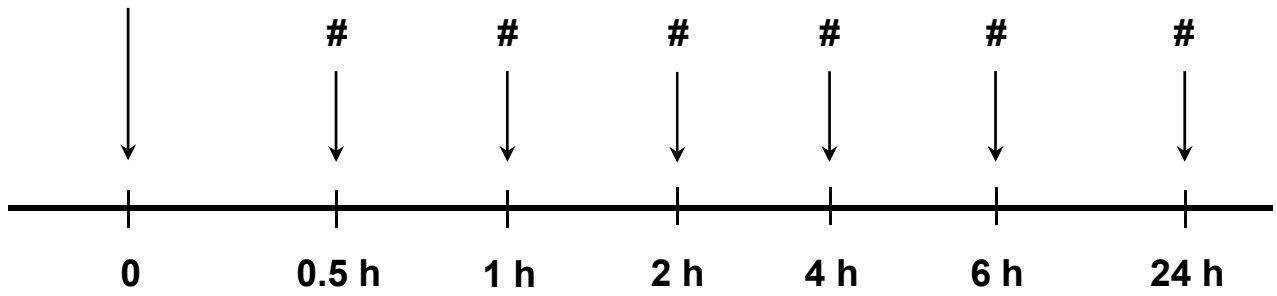

**b**

**MA**  
(35 mg/kg, i.p.)

**U0126**  
(2  $\mu$ g/ $\mu$ l, i.c.v.)

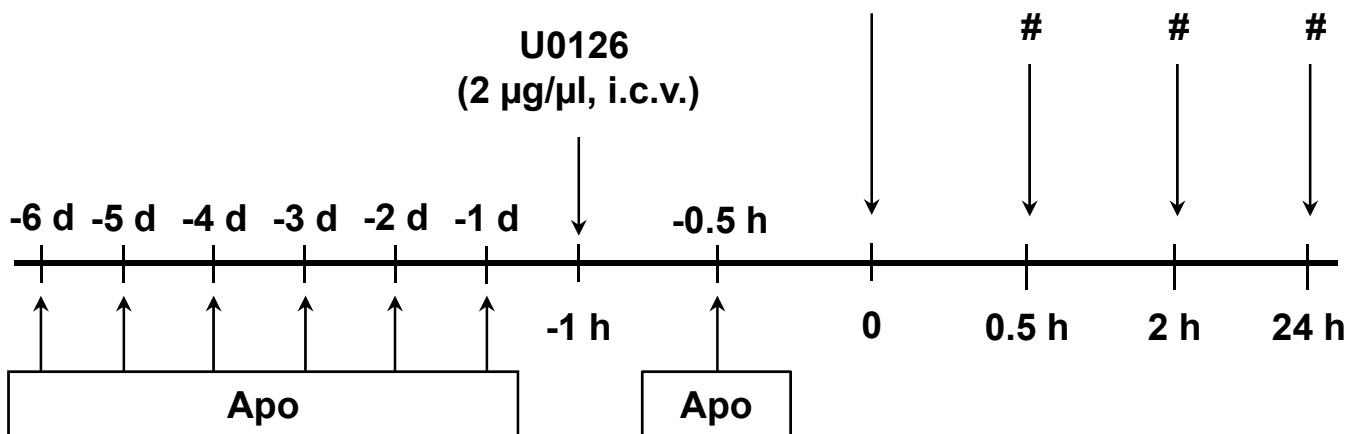

**#: Sacrifice**

**Fig. S5**

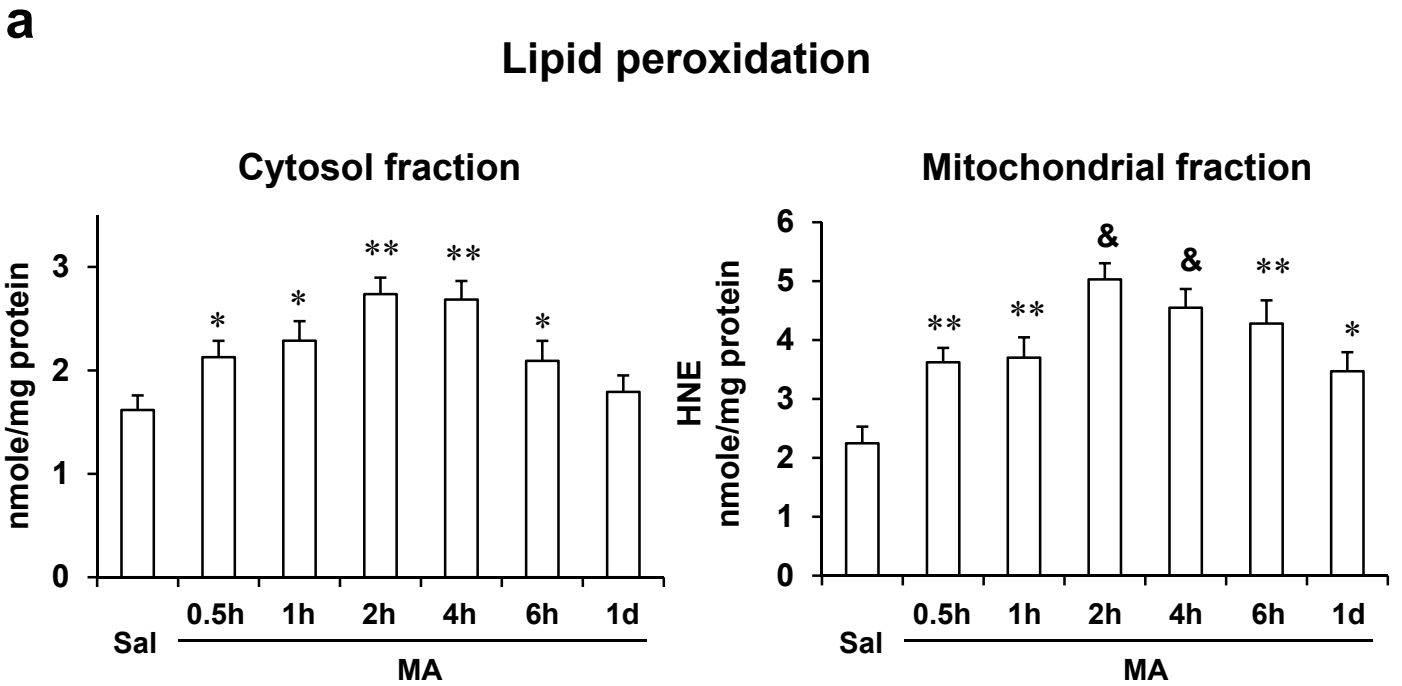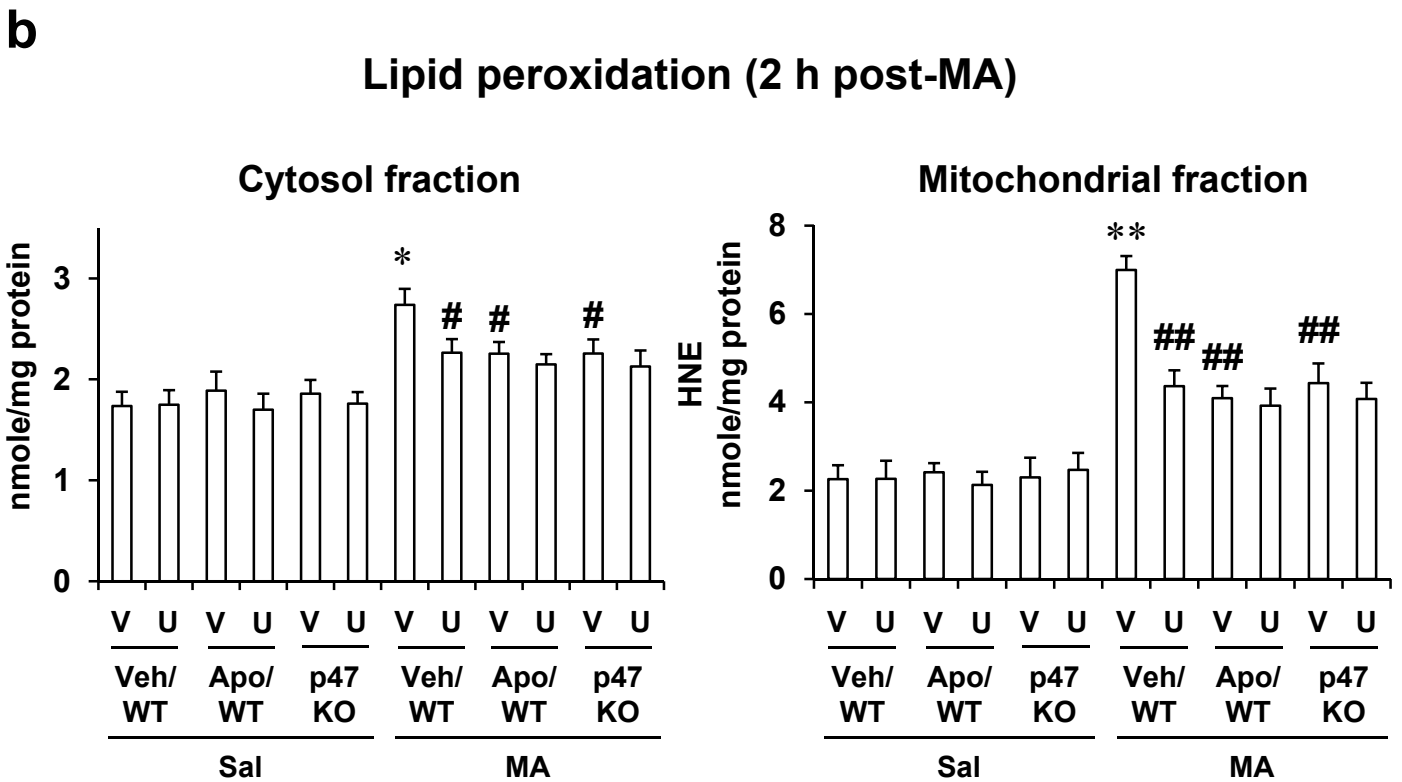

Fig. S6

**a****Protein oxidation**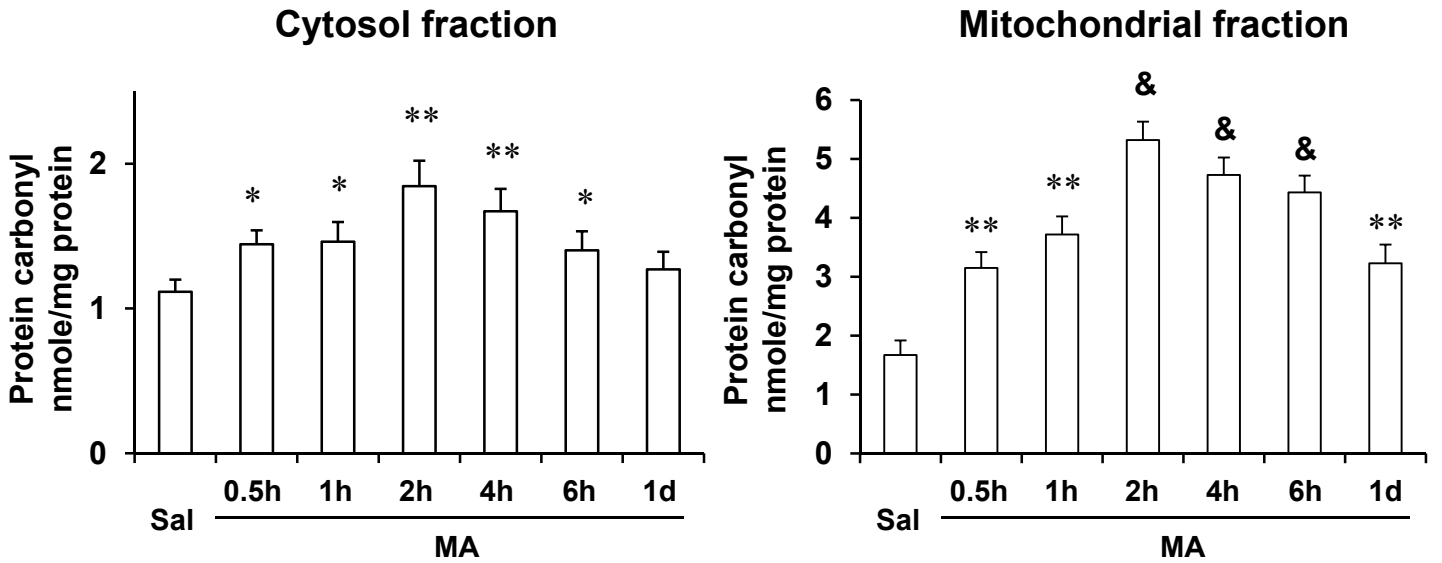**b****Protein oxidation (2 h post-MA)**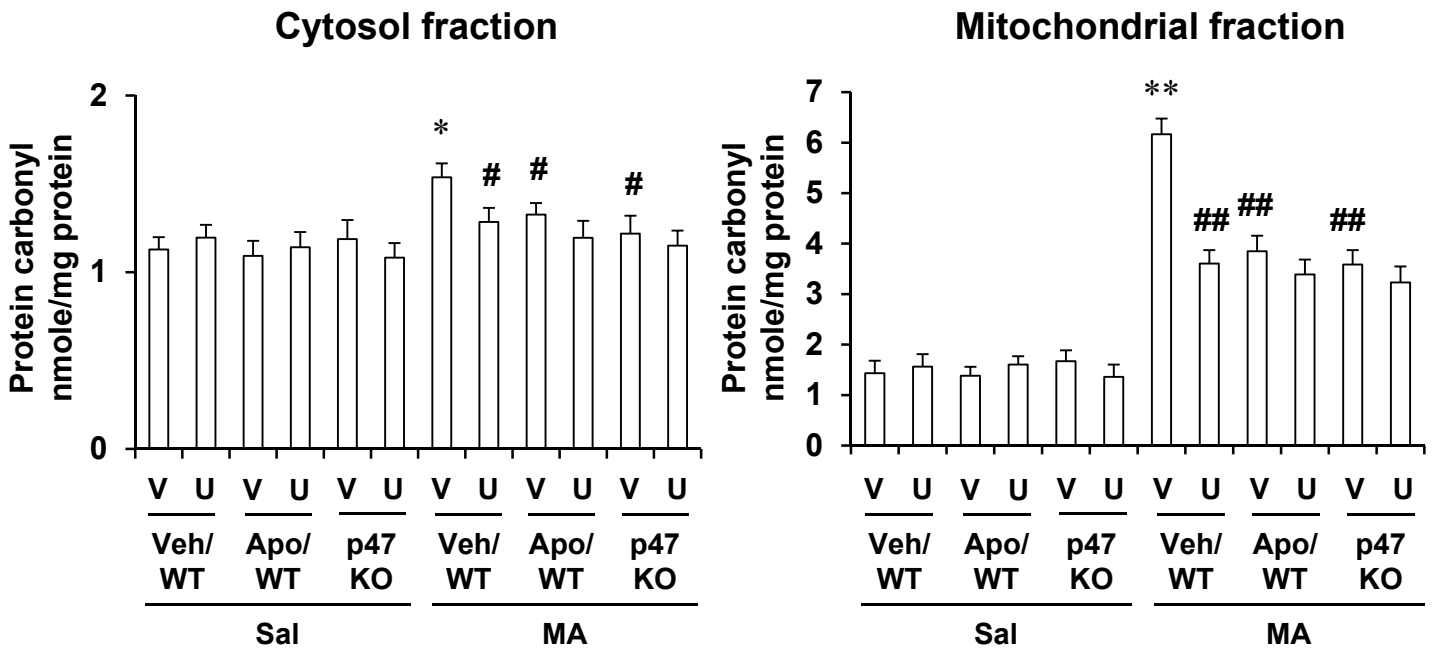

Fig. S7

**a-1**

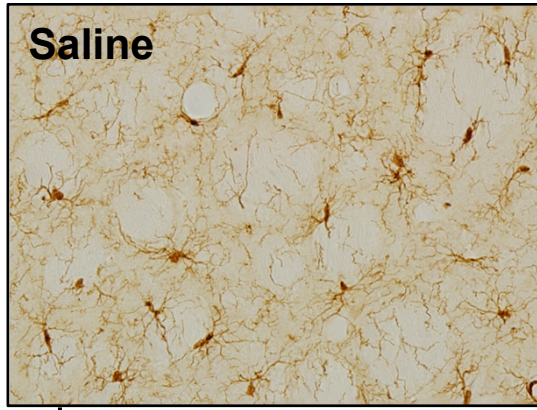

**Skeletonize**

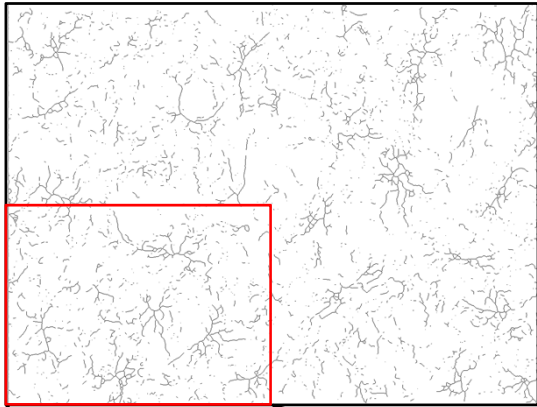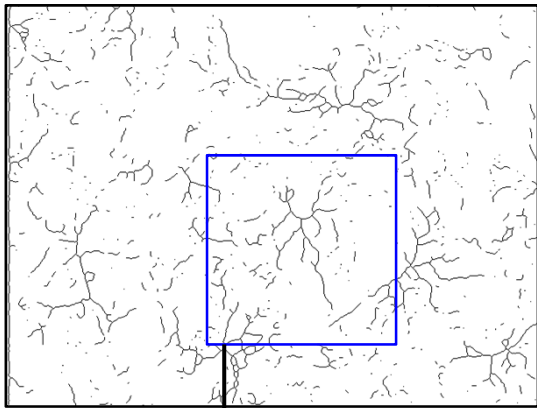

**Skeleton analysis**

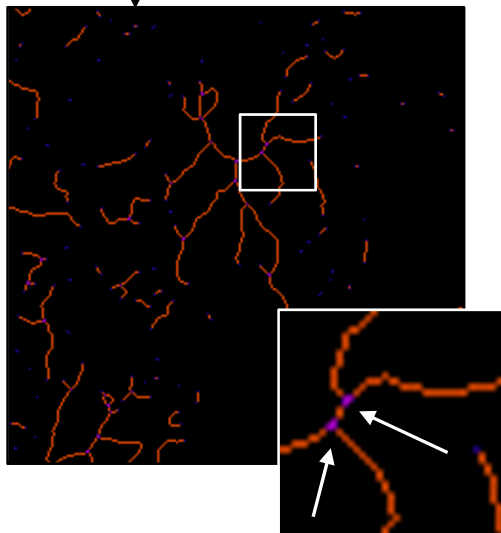

**a-2**

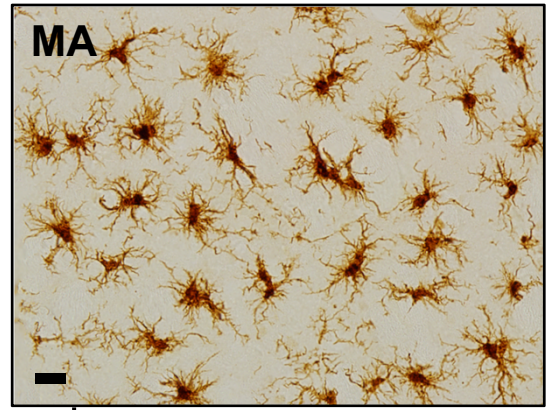

**Skeletonize**

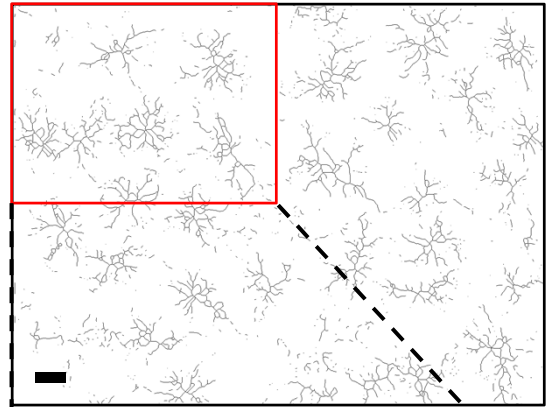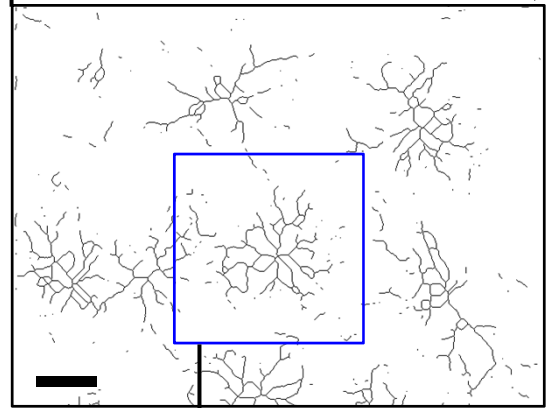

**Skeleton analysis**

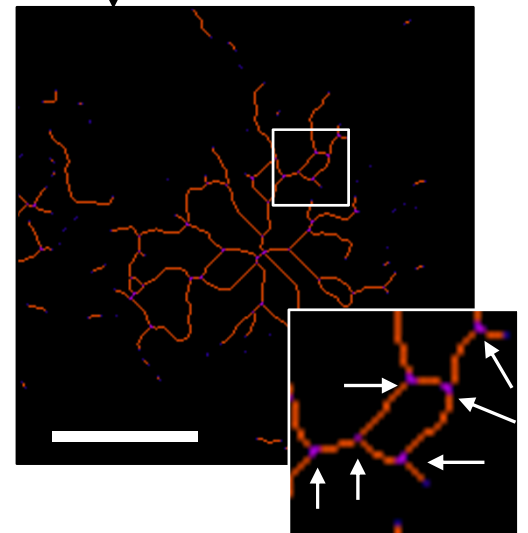

**Fig. S8**



**b-1**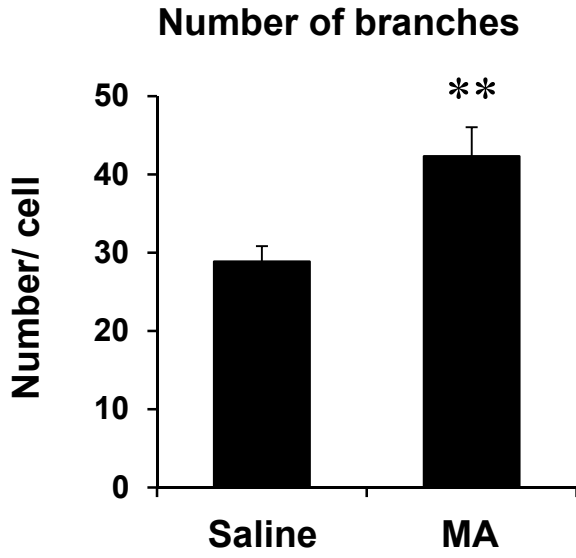**b-4**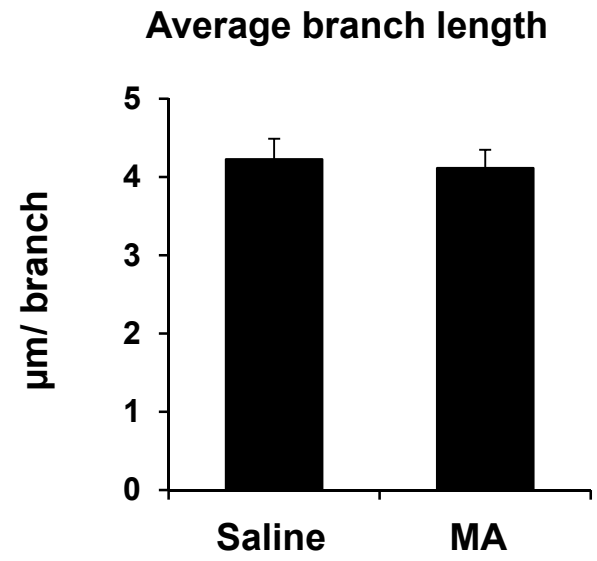**b-2**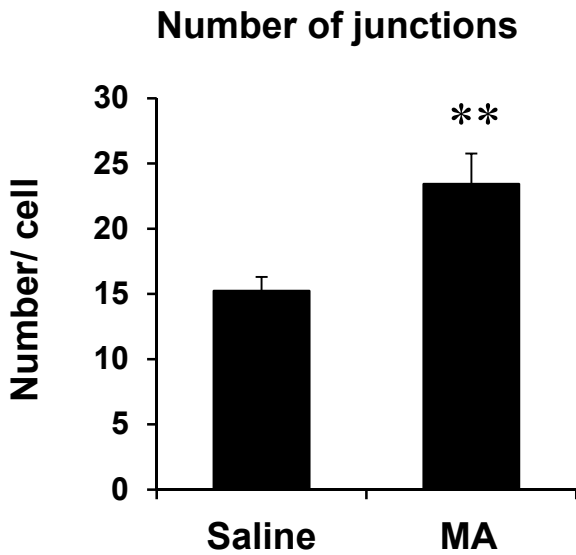**b-5**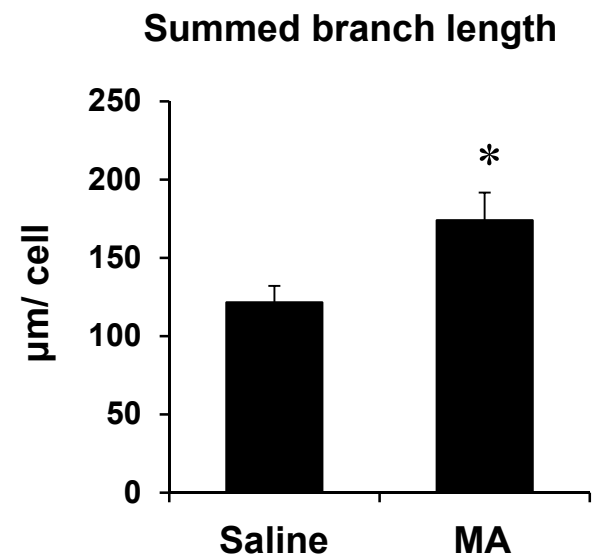**b-3**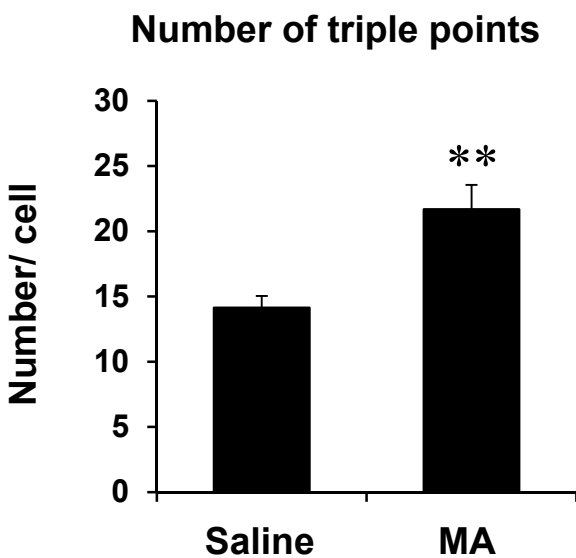

Fig. S8 (continued)

**c-1**

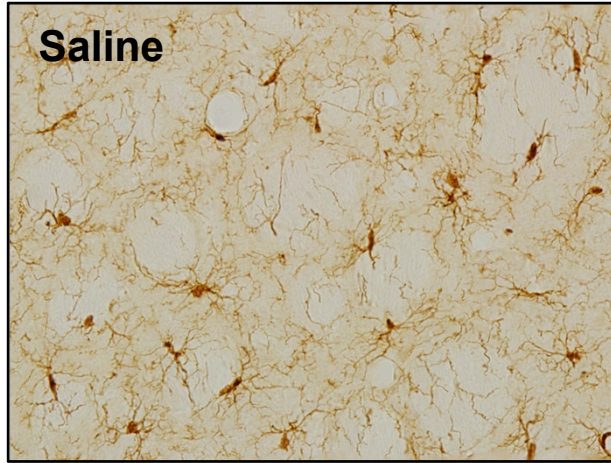

**c-4**

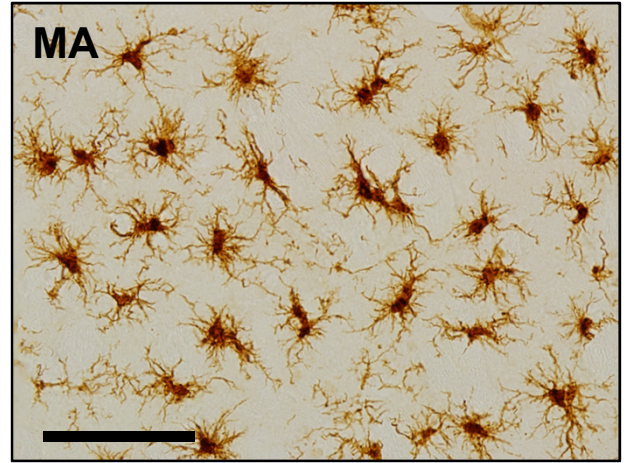

**c-2**

**Automatic dark objects**

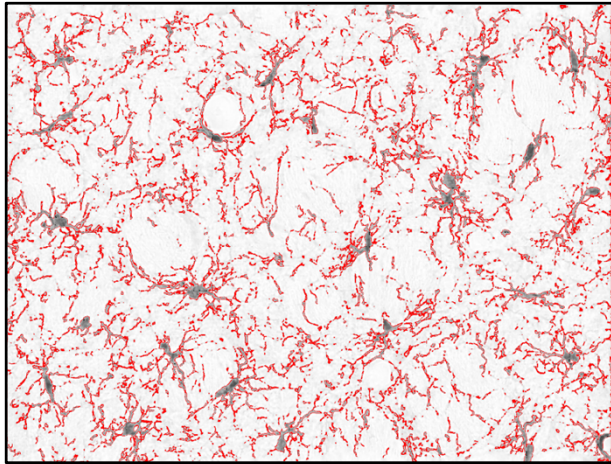

**c-5**

**Automatic dark objects**

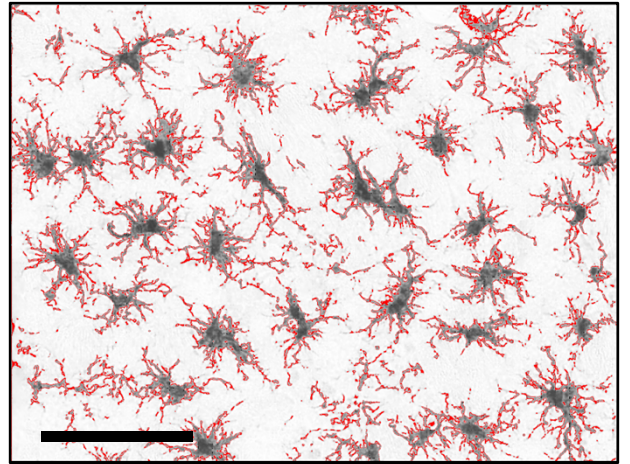

**c-3**

**Manual intensity selection**

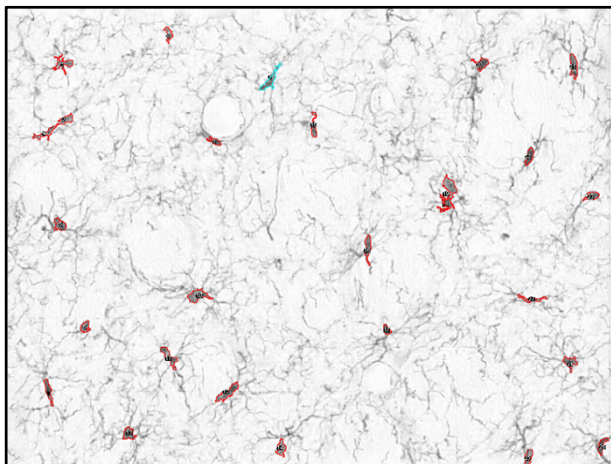

**c-6**

**Manual intensity selection**

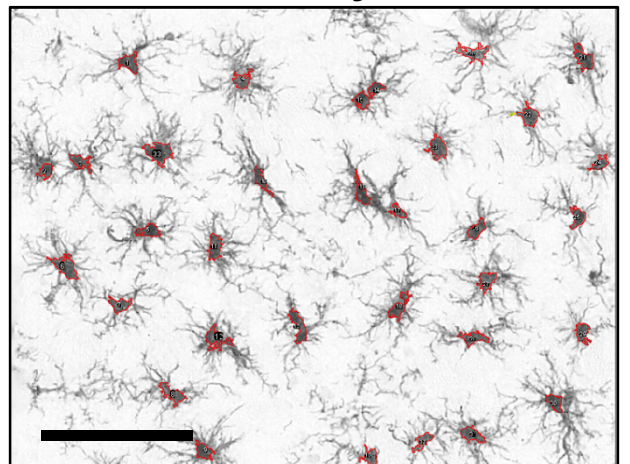

**Fig. S8 (continued)**

**d-1**

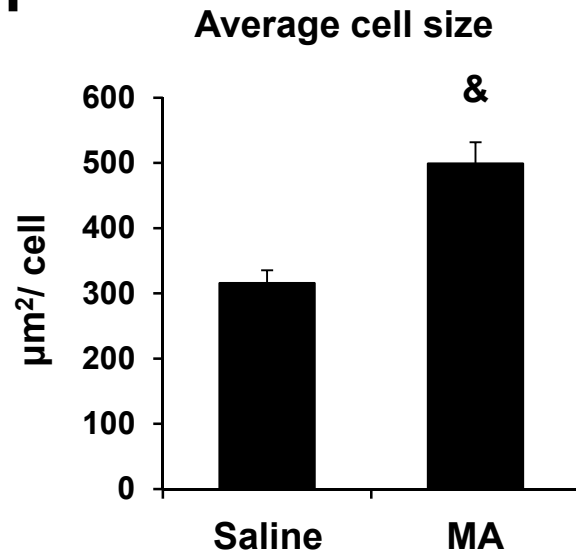

**d-2**

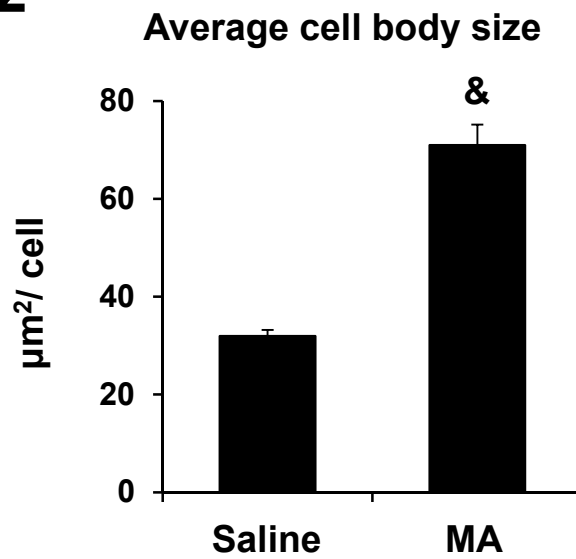

**d-3**

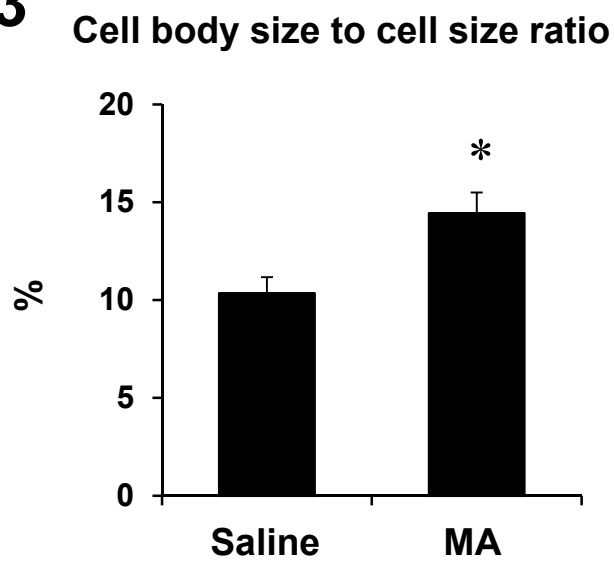

Fig. S8 (continued)
